# Supplementary material
Source: PubMed Central journal article supplement (PMC6364830)
Supplement: NIHMS1005778-supplement-Supplementary_Figure_1.pdf [file NIHMS1005778-supplement-Supplementary_Figure_1.pdf]

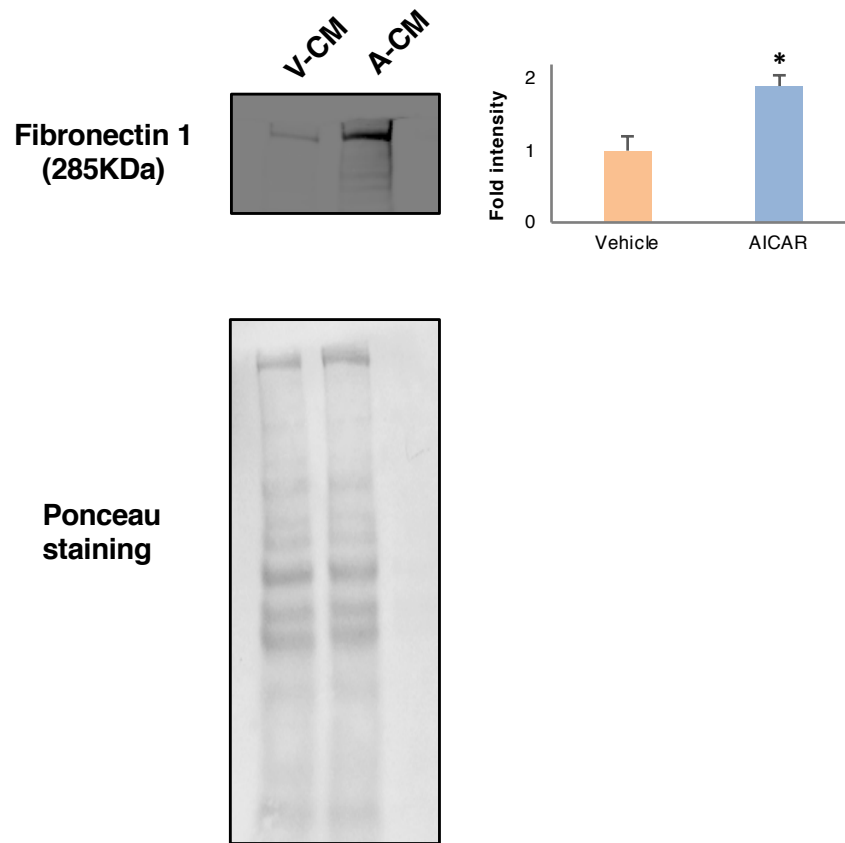

Supplementary Figure 1. Validation of mass-spectrometry analysis. Fibronectin1, was observed in AICAR-treated and vehicle-treated control CM, and validated by immuno-blotting. Ponceau staining was used as a loading control. Densitometry analysis indicated that Fibronectin1 levels were increased in AICAR-CM as compared to control conditions (\* $p < 0.05$ ).
